# Supplementary material for: New triazole-based coordination complexes as antitumor agents against triple negative breast cancer MDA-MB-468 cell line
Source: Royal Society of Chemistry journal article supplement (doi:10.1039/d3ra07714d), 2023-01-01
Supplement: d3ra07714d1.pdf [file d3ra07714d1.pdf]

## Electronic Supplementary document (ESI)

### **New Triazole-based Coordination Complexes as Antitumor Agents against Triple Negative Breast Cancer MDA-MB-468 Cell Line**

Youssef Draoui,<sup>1</sup> Smaail Radi,<sup>\*1</sup> Yousra Bahjou,<sup>1,2</sup> Abderrazaka Idir,<sup>3</sup> Amal El Mahdaoui,<sup>1</sup> Abdelmajidb Zyad,<sup>3</sup> Haralampos N. Miras,<sup>4</sup> Marilena Ferbinteanu,<sup>5</sup> Aurelian Rotaru,<sup>6</sup> Yann Garcia<sup>\*2</sup>

<sup>1</sup> *LCAE, Department of Chemistry, Faculty of Science, University Mohamed I , P.O. Box 524, Oujda 60 000, Morocco.*

<sup>2</sup> *Institute of Condensed Matter and Nanosciences, Molecular Chemistry, Materials and Catalysis (IMCN/MOST), Université catholique de Louvain, Place L. Pasteur 1, 1348 Louvain-la-Neuve, Belgium.*

<sup>3</sup> *Team of Experimental Oncology and Natural Substances, Cellular and Molecular Immuno pharmacology, Faculty of Science and Technology, Sultan Moulay Slimane University, Beni-Mellal, Morocco.*

<sup>4</sup> *School of Chemistry, Joseph Black Building, University of Glasgow, Glasgow G12 8QQ, UK.*

<sup>5</sup> *Inorganic Chemistry Department, Faculty of Chemistry, University of Bucharest, Panduri Road, no. 90, Bucharest 050663, Romania*

<sup>6</sup> *Department of Electrical Engineering and Computer Science & Research Center MANSiD, “Stefan cel Mare” University, University Street, No. 13, Suceava 720229, Romania*

*E-mail: [yann.garcia@uclouvain.be](mailto:yann.garcia@uclouvain.be) ; [s.radi@ump.ac.ma](mailto:s.radi@ump.ac.ma)*

## Content:

|                                                                                                                                   |    |
|-----------------------------------------------------------------------------------------------------------------------------------|----|
| <b>Table S1.</b> Summary of crystallographic data and refinement for <b>5-11</b> .....                                            | 3  |
| <b>Table S2.</b> Selected bond lengths [Å] and angles [°] for <b>5-11</b> .....                                                   | 4  |
| <b><sup>1</sup>H NMR LM</b> .....                                                                                                 | 5  |
| <b><sup>13</sup>C NMR LM</b> .....                                                                                                | 6  |
| <b>Figure S1.</b> Diffuse reflectance spectroscopic comparison of <b>LM</b> and <b>5-11</b> .....                                 | 7  |
| <b>Figure S2.</b> SQUID measurement on <b>9</b> carried out over the temperature range (300-5 K) over three consecutive runs..... | 8  |
| <b>Figure S3.</b> Mössbauer spectrum in transmission mode of <b>9</b> recorded at room temperature.....                           | 9  |
| <b>HRMS of LM</b> .....                                                                                                           | 10 |
| <b>HRMS of 5</b> .....                                                                                                            | 11 |
| <b>HRMS of 6</b> .....                                                                                                            | 12 |
| <b>HRMS of 7</b> .....                                                                                                            | 13 |
| <b>HRMS of 8</b> .....                                                                                                            | 14 |
| <b>HRMS of 10</b> .....                                                                                                           | 15 |



**Table S1.** Summary of crystallographic data and refinement for **5-11**.

| Compounds                                                   | (5)                                                                  | (6)                                                                                             | (7)                                                               | (8)                                                              | (9)                                                                                 | (10)                                                                                | (11)                                                             |
|-------------------------------------------------------------|----------------------------------------------------------------------|-------------------------------------------------------------------------------------------------|-------------------------------------------------------------------|------------------------------------------------------------------|-------------------------------------------------------------------------------------|-------------------------------------------------------------------------------------|------------------------------------------------------------------|
| Empirical formula                                           | C <sub>26</sub> H <sub>39</sub> Cl <sub>2</sub> N <sub>15</sub> NiOS | C <sub>52</sub> H <sub>76</sub> Cl <sub>4</sub> Co <sub>2</sub> N <sub>30</sub> O <sub>17</sub> | C <sub>16</sub> H <sub>22</sub> CdCl <sub>2</sub> N <sub>10</sub> | C <sub>16</sub> H <sub>22</sub> CuN <sub>12</sub> O <sub>6</sub> | C <sub>24</sub> H <sub>33</sub> B <sub>2</sub> F <sub>8</sub> Fe<br>N <sub>15</sub> | C <sub>24</sub> H <sub>33</sub> B <sub>2</sub> F <sub>8</sub> Zn<br>N <sub>15</sub> | C <sub>16</sub> H <sub>22</sub> N <sub>12</sub> ZnO <sub>6</sub> |
| Formula weight                                              | 867.39                                                               | 1653.08                                                                                         | 537.73                                                            | 541.99                                                           | 761.12                                                                              | 770.64                                                                              | 543.82                                                           |
| Crystal size (mm)                                           | 0.30 x 0.20 x 0.10                                                   | 0.30 x 0.14 x 0.10                                                                              | 0.60 x 0.40 x<br>0.30                                             | 0.50 x 0.30 x<br>0.25                                            | 0.40 x 0.35 x<br>0.15                                                               | 0.50 x 0.47 x<br>0.20                                                               | 0.20 x 0.18 x<br>0.15                                            |
| Crystal system                                              | Triclinic                                                            | triclinic                                                                                       | monoclinic                                                        | Monoclinic                                                       | triclinic                                                                           | Triclinic                                                                           | monoclinic                                                       |
| Space group                                                 | <i>P</i> -1 (#2)                                                     | <i>P</i> -1 (#2)                                                                                | <i>P</i> 2 <sub>1</sub> / <i>c</i> (#14)                          | <i>C</i> 2/ <i>c</i> (#15)                                       | <i>P</i> -1 (#2)                                                                    | <i>P</i> -1 (#2)                                                                    | <i>C</i> 2/ <i>c</i> (#15)                                       |
| <i>a</i> (Å)                                                | 11.1956(13)                                                          | 11.7384(12)                                                                                     | 7.1207(3)                                                         | 15.2108(11)                                                      | 11.6977(19)                                                                         | 11.7208(8)                                                                          | 15.3500(5)                                                       |
| <i>b</i> (Å)                                                | 14.8446(14)                                                          | 11.7537(11)                                                                                     | 17.0820(8)                                                        | 14.0236(9)                                                       | 11.7249(9)                                                                          | 11.7347(10)                                                                         | 13.6196(4)                                                       |
| <i>c</i> (Å)                                                | 14.8844(18)                                                          | 15.3103(9)                                                                                      | 8.8551(4)                                                         | 11.5087(9)                                                       | 15.229(2)                                                                           | 15.1727(9)                                                                          | 11.4186(3)                                                       |
| $\alpha$ (°)                                                | 119.056(11)                                                          | 80.114(7)                                                                                       | 90                                                                | 90                                                               | 79.371(9)                                                                           | 79.553(6)                                                                           | 90                                                               |
| $\beta$ (°)                                                 | 92.646(10)                                                           | 78.156(8)                                                                                       | 94.076(2)                                                         | 108.678(9)                                                       | 79.491(12)                                                                          | 79.334(6)                                                                           | 109.496(3)                                                       |
| $\gamma$ (°)                                                | 110.233(10)                                                          | 73.278(9)                                                                                       | 90                                                                | 90                                                               | 73.371(10)                                                                          | 73.196(7)                                                                           | 90                                                               |
| Volume (Å <sup>3</sup> )                                    | 1958.6(4)                                                            | 1965.6(3)                                                                                       | 1074.37(8)                                                        | 2325.6(3)                                                        | 1948.3(5)                                                                           | 1945.0(3)                                                                           | 2250.31(12)                                                      |
| <i>Z</i>                                                    | 2                                                                    | 1                                                                                               | 2                                                                 | 4                                                                | 2                                                                                   | 2                                                                                   | 4                                                                |
| $\rho_{\text{calc}}$ (g/cm <sup>3</sup> )                   | 1.471                                                                | 1.397                                                                                           | 1.662                                                             | 1.548                                                            | 1.297                                                                               | 1.316                                                                               | 1.605                                                            |
| F(000)                                                      | 900                                                                  | 856                                                                                             | 540.00                                                            | 1116                                                             | 780                                                                                 | 788                                                                                 | 1120                                                             |
| $\mu_{\text{MoK}\alpha}$ (cm <sup>-1</sup> )                | 0.752                                                                | 0.637                                                                                           | 1.291                                                             | 0.999                                                            | 0.463                                                                               | 0.707                                                                               | 1.153                                                            |
| T (K)                                                       | 293(2)                                                               | 293(2)                                                                                          | 293                                                               | 293(2)                                                           | 293(2)                                                                              | 297(2)                                                                              | 150(2)                                                           |
| $\theta$ min/max                                            | 3.157/26.158                                                         | 3.035/26.203                                                                                    | 3.106/ 27.500                                                     | 3.455/26.040                                                     | 2.873/26.165                                                                        | 3.096/26.157                                                                        | 2.454/53.701                                                     |
| Refl. collected/unique                                      | 30651/7776                                                           | 27103/7827                                                                                      | 4681/2316                                                         | 7610/2272                                                        | 20213/ 7758                                                                         | 15416/7190                                                                          | 17389/7841                                                       |
| Data/restraints/parameters                                  | 7776/156/ 555                                                        | 7827/50/551                                                                                     | 2316/0/133                                                        | 2272/62/194                                                      | 7758/60/522                                                                         | 7190/110/506                                                                        | 7841/1/178                                                       |
| Goodness of fit on <i>F</i> <sup>2</sup>                    | 1.046                                                                | 1.068                                                                                           | 1.065                                                             | 1.078                                                            | 1.068                                                                               | 1.030                                                                               | 1.056                                                            |
| Final <i>R</i> indices [ <i>I</i> >2 $\sigma$ ( <i>I</i> )] | R <sub>1</sub> = 0.0514,<br>wR <sub>2</sub> =0.1412                  | R <sub>1</sub> =0.0478,<br>wR <sub>2</sub> =0.1397                                              | R <sub>1</sub> = 0.0469,<br>wR <sub>2</sub> = 0.1278              | R <sub>1</sub> =0.0452,<br>wR <sub>2</sub> =0.1284               | R <sub>1</sub> =0.0554,<br>wR <sub>2</sub> =0.1499                                  | R <sub>1</sub> =0.0456,<br>wR <sub>2</sub> =0.1268                                  | R <sub>1</sub> =0.0587,<br>wR <sub>2</sub> =0.1700               |
| <i>R</i> indices (all data)                                 | R <sub>1</sub> = 0.0584,<br>wR <sub>2</sub> =0.1462                  | R <sub>1</sub> = 0.0558,<br>wR <sub>2</sub> =0.1458                                             | R <sub>1</sub> = 0.0489,<br>wR <sub>2</sub> = 0.1312              | R <sub>1</sub> = 0.0472,<br>wR <sub>2</sub> =0.1299              | R <sub>1</sub> =0.0723,<br>wR <sub>2</sub> =0.1635                                  | R <sub>1</sub> =0.0506,<br>wR <sub>2</sub> =0.1304                                  | R <sub>1</sub> =0.0990,<br>wR <sub>2</sub> =0.1894               |

**Table S2.** Selected bond lengths [Å] and angles [°] for **5-11**.

| Compound  | Bond lengths, Å |            | Bond angles, °       |            |
|-----------|-----------------|------------|----------------------|------------|
| <b>5</b>  | Ni(1)-N(30)     | 2.072(2)   | N(30)-Ni(1)-N(2)     | 91.94(9)   |
|           | Ni(1)-N(10)     | 2.073(2)   | N(30)-Ni(1)-N(22)    | 77.68(8)   |
|           | Ni(1)-N(50)     | 2.080(2)   | N(50)-Ni(1)-N(22)    | 93.84(9)   |
|           | Ni(1)-N(2)      | 2.136(2)   | N(2)-Ni(1)-N(22)     | 98.81(8)   |
|           | Ni(1)-N(22)     | 2.138(2)   | N(50)-Ni(1)-N(42)    | 77.18(9)   |
|           | Ni(1)-N(42)     | 2.142(2)   | N(2)-Ni(1)-N(42)     | 100.49(9)  |
| <b>6</b>  | Co(1)-N(10)     | 2.100(2)   | N(10)-Co(1)-N(2)     | 77.14(8)   |
|           | Co(1)-N(50)     | 2.116(2)   | N(50)-Co(1)-N(2)     | 95.50(8)   |
|           | Co(1)-N(30)     | 2.125(2)   | N(30)-Co(1)-N(22)    | 75.84(8)   |
|           | Co(1)-N(2)      | 2.170(2)   | N(2)-Co(1)-N(22)     | 89.40(9)   |
|           | Co(1)-N(22)     | 2.170(2)   | N(10)-Co(1)-N(42)    | 93.70(8)   |
|           | Co(1)-N(42)     | 2.173(2)   | N(22)-Co(1)-N(42)    | 101.25(8)  |
| <b>7</b>  | Cd(1)-N(3)#1    | 2.411(3)   | N(1)#1-Cd(1)-N(1)    | 180.0      |
|           | Cd(1)-N(3)      | 2.411(3)   | N(3)#1-Cd(1)-Cl(1)   | 89.24(8)   |
|           | Cd(1)-N(1)#1    | 2.414(2)   | N(3)-Cd(1)-Cl(1)     | 90.76(8)   |
|           | Cd(1)-N(1)      | 2.414(2)   | N(1)#1-Cd(1)-Cl(1)   | 89.24(6)   |
|           | Cd(1)-Cl(1)     | 2.5426(9)  | N(3)#1-Cd(1)-Cl(1)#1 | 90.76(8)   |
|           | Cd(1)-Cl(1)#1   | 2.5426(9)  | Cl(1)-Cd(1)-Cl(1)#1  | 180.0      |
| <b>8</b>  | Cu(1)-O(23)     | 2.018(5)   | O(23)-Cu(1)-N(2)     | 86.42(17)  |
|           | Cu(1)-N(2)      | 2.042(2)   | N(2)#1-Cu(1)-N(10)#1 | 79.22(9)   |
|           | Cu(1)-N(2)#1    | 2.042(2)   | O(23)-Cu(1)-N(10)    | 100.97(14) |
|           | Cu(1)-N(10)#1   | 2.112(2)   | N(2)-Cu(1)-N(10)     | 79.22(9)   |
|           | Cu(1)-N(10)     | 2.112(2)   | N(2)#1-Cu(1)-N(10)   | 97.82(10)  |
|           |                 |            | N(10)#1-Cu(1)-N(10)  | 104.36(13) |
| <b>9</b>  | Fe(1)-N(30)     | 2.152(2)   | N(10)-Fe(1)-N(50)    | 87.89(9)   |
|           | Fe(1)-N(10)     | 2.161(2)   | N(30)-Fe(1)-N(42)    | 102.94(8)  |
|           | Fe(1)-N(50)     | 2.186(2)   | N(50)-Fe(1)-N(42)    | 74.03(8)   |
|           | Fe(1)-N(42)     | 2.196(2)   | N(30)-Fe(1)-N(22)    | 75.53(8)   |
|           | Fe(1)-N(22)     | 2.201(2)   | N(42)-Fe(1)-N(22)    | 92.11(9)   |
|           | Fe(1)-N(2)      | 2.216(2)   | N(30)-Fe(1)-N(2)     | 94.02(8)   |
| <b>10</b> | Zn(1)-N(30)     | 2.1104(18) | N(10)-Zn(1)-N(22)    | 95.60(8)   |
|           | Zn(1)-N(10)     | 2.1411(19) | N(30)-Zn(1)-N(42)    | 101.03(7)  |
|           | Zn(1)-N(50)     | 2.1512(19) | N(50)-Zn(1)-N(42)    | 75.16(7)   |
|           | Zn(1)-N(22)     | 2.191(2)   | N(22)-Zn(1)-N(42)    | 91.87(8)   |
|           | Zn(1)-N(42)     | 2.191(2)   | N(30)-Zn(1)-N(2)     | 94.04(7)   |
|           | Zn(1)-N(2)      | 2.211(2)   | N(42)-Zn(1)-N(2)     | 99.48(8)   |
| <b>11</b> | N(6)-Zn(1)      | 2.1884(14) | N(11)-Zn(1)-N(11)#1  | 105.08(8)  |

|             |            |                       |          |
|-------------|------------|-----------------------|----------|
| N(11)-Zn(1) | 2.0637(14) | N(11)#1-Zn(1)-O(30)#1 | 97.75(5) |
| O(30)-Zn(1) | 2.1682(14) | O(30)#1-Zn(1)-O(30)   | 59.80(7) |
|             |            | N(11)-Zn(1)-N(6)      | 77.57(5) |
|             |            | O(30)#1-Zn(1)-N(6)    | 95.53(5) |
|             |            | O(30)-Zn(1)-N(6)      | 89.40(5) |

## <sup>1</sup>H NMR LM

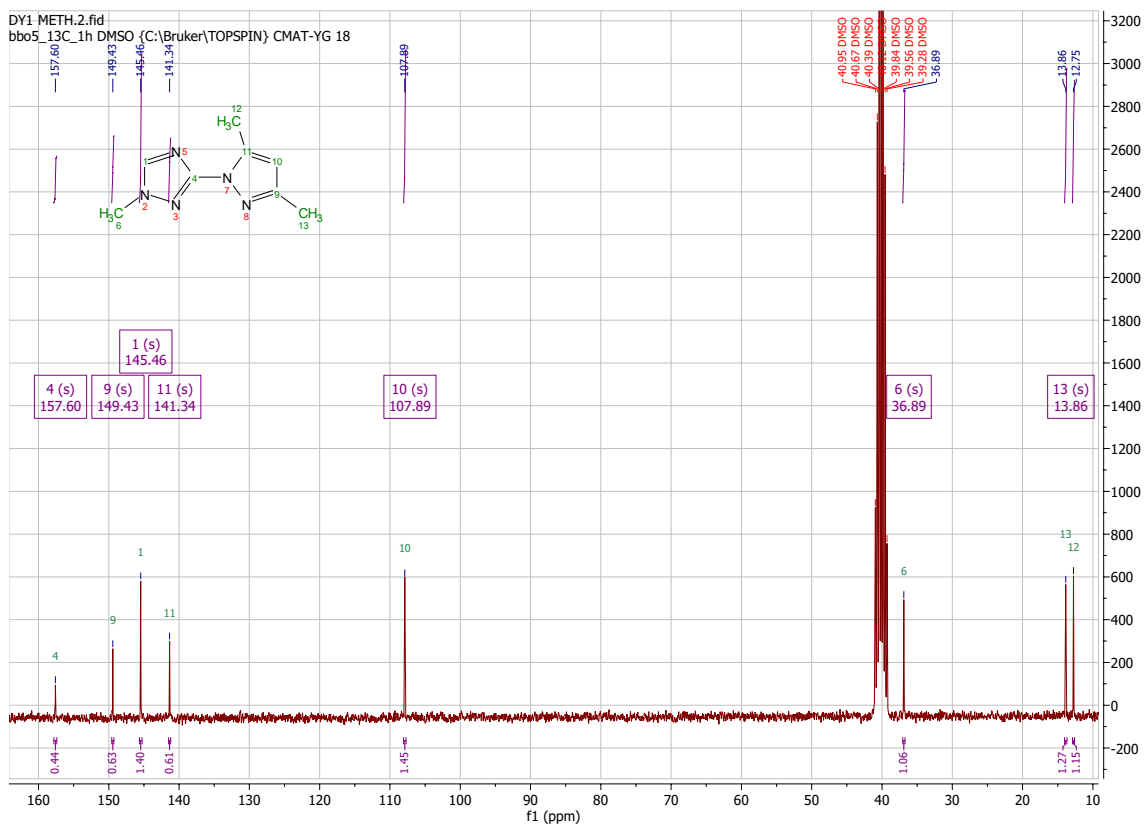

# <sup>13</sup>C NMR LM:

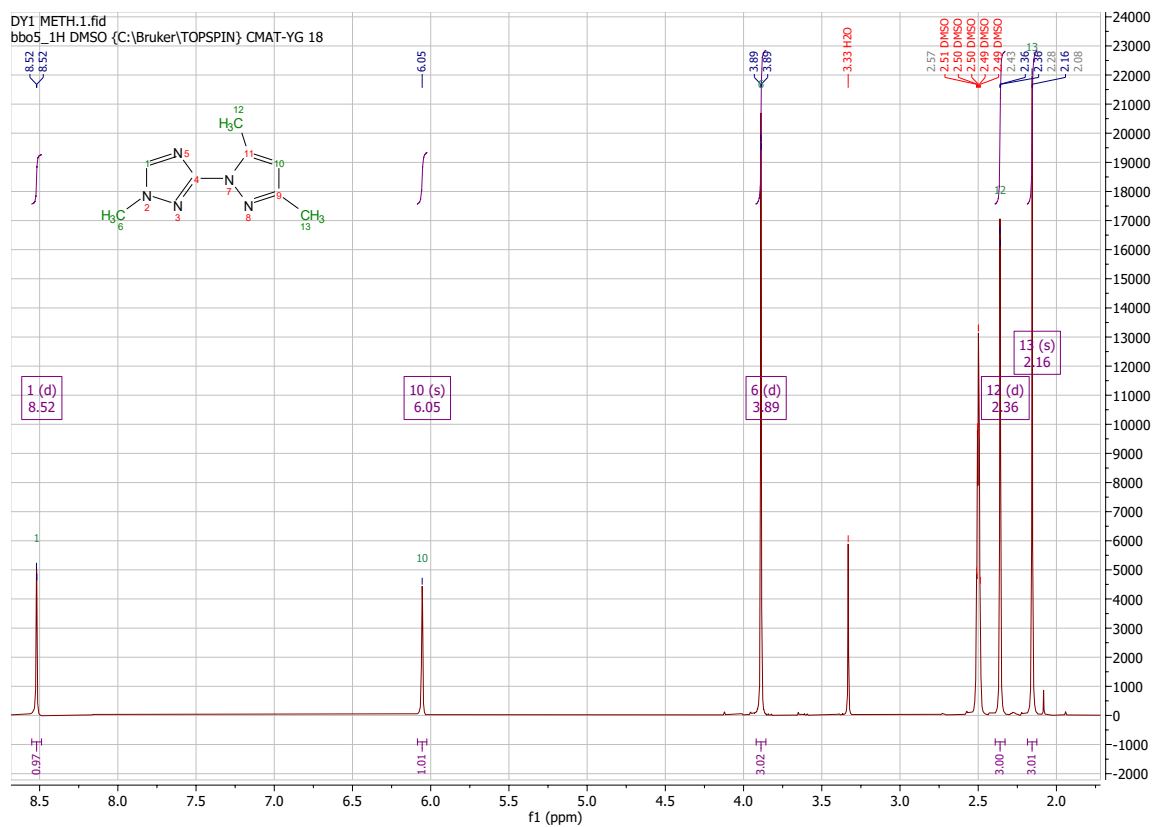

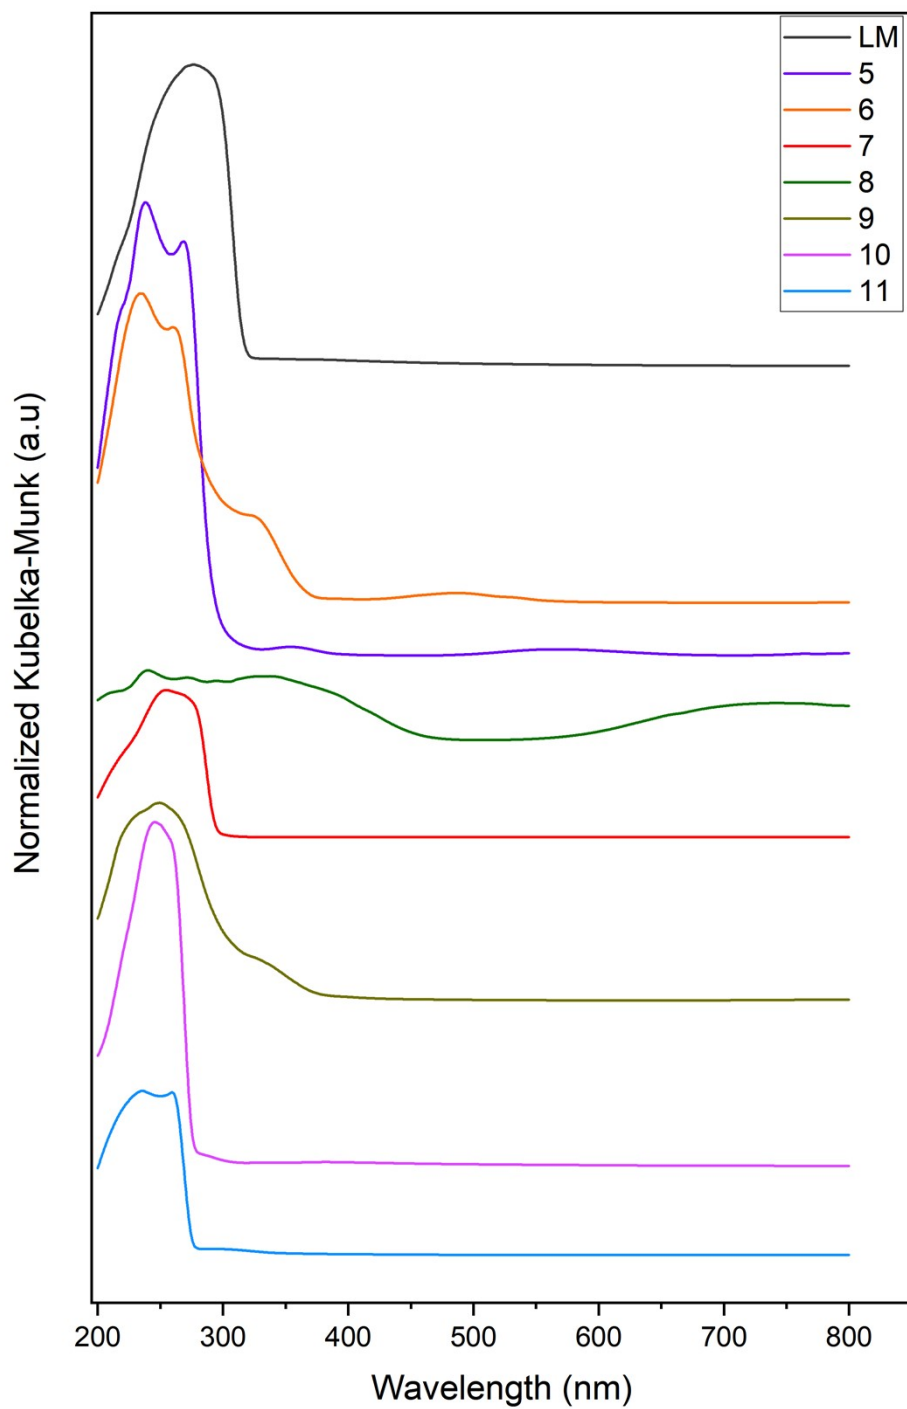

**Figure S1.** Diffuse reflectance spectroscopic comparison of **LM** and **5-11**.



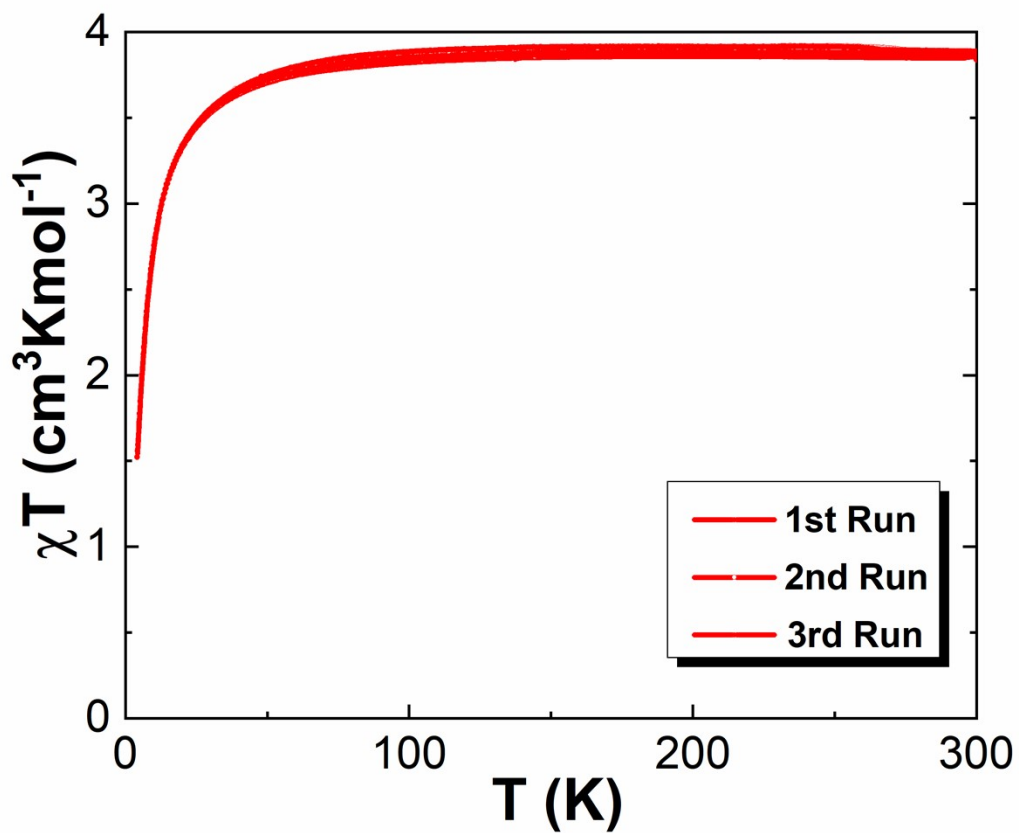

**Figure S2.** SQUID measurement on **9** carried out over the temperature range (300-5 K) over three consecutive runs.

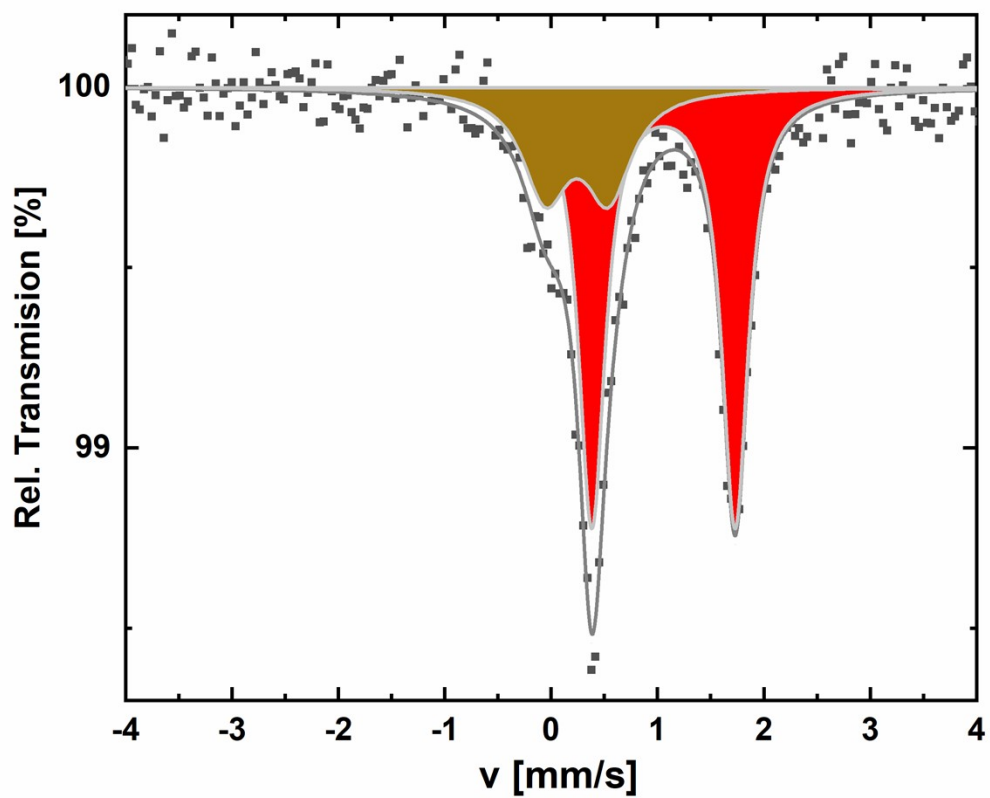

**Figure S3.** Mössbauer spectrum in transmission mode of **9** recorded at room temperature.

**HRMS of LM:**

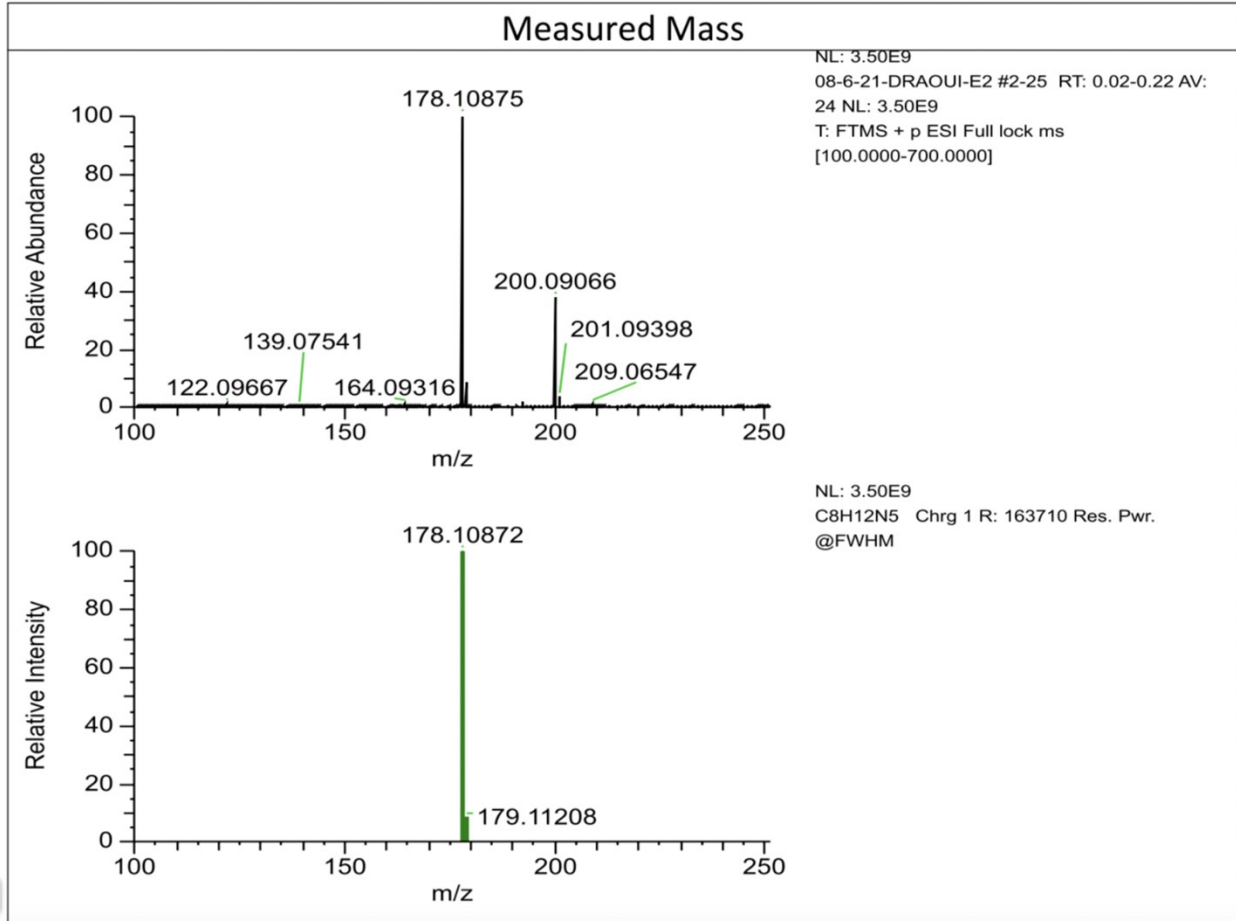

**Elemental Composition Results**

| Peak Mass | Display Formula                               | MS Cov. [%] | Delta [ppm] | Theo. mass |
|-----------|-----------------------------------------------|-------------|-------------|------------|
| 178.10875 | C <sub>8</sub> H <sub>12</sub> N <sub>5</sub> | 99.74       | 0.18        | 178.10872  |

**HRMS of 5:**

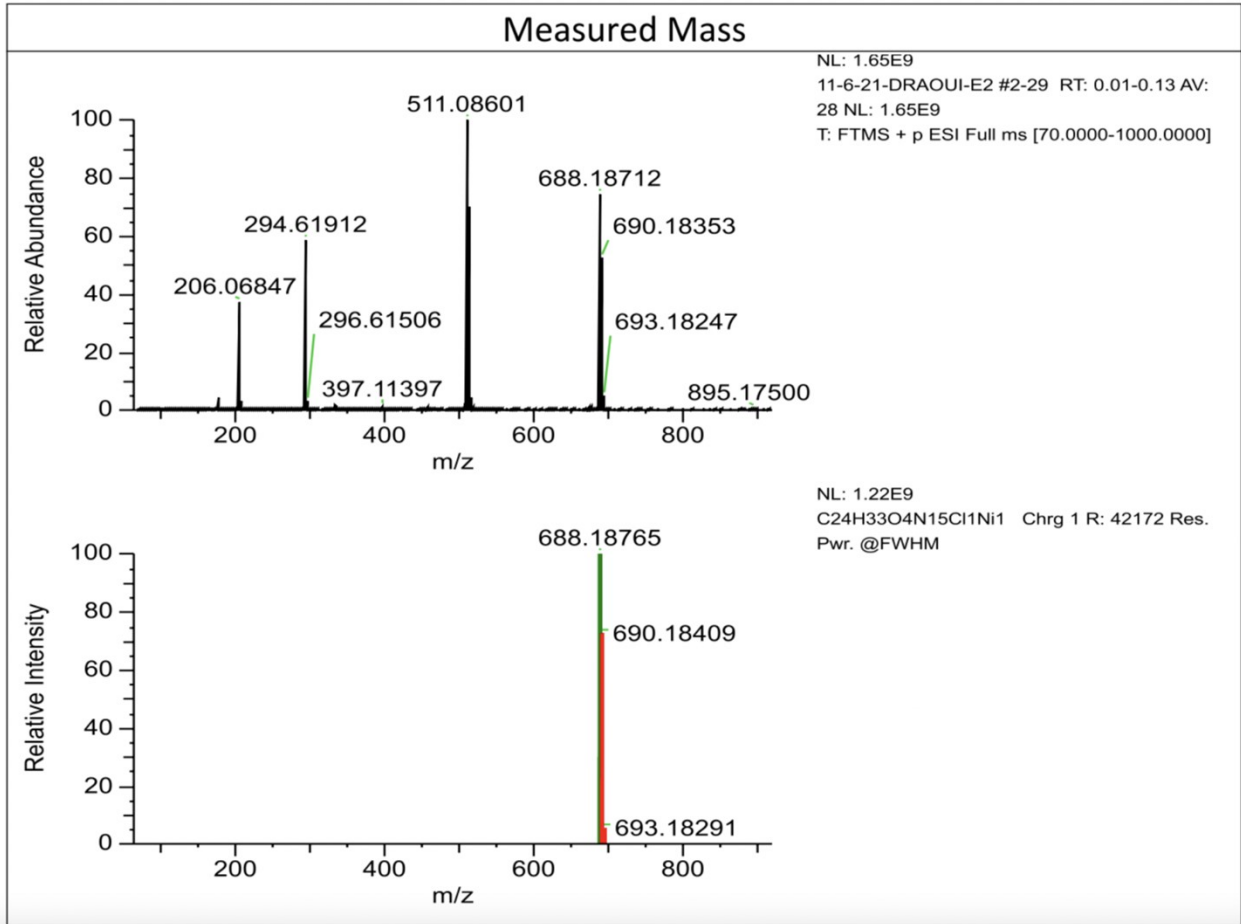

**Elemental Composition Results**

| Peak Mass | Display Formula                                                                                  | MS Cov. [%] | Delta [ppm] | Theo. mass |
|-----------|--------------------------------------------------------------------------------------------------|-------------|-------------|------------|
| 688.18712 | C <sub>24</sub> H <sub>33</sub> O <sub>4</sub> N <sub>15</sub> <sup>35</sup> Cl <sup>68</sup> Ni | 99.94       | -0.76       | 688.18765  |

**HRMS of 6:**

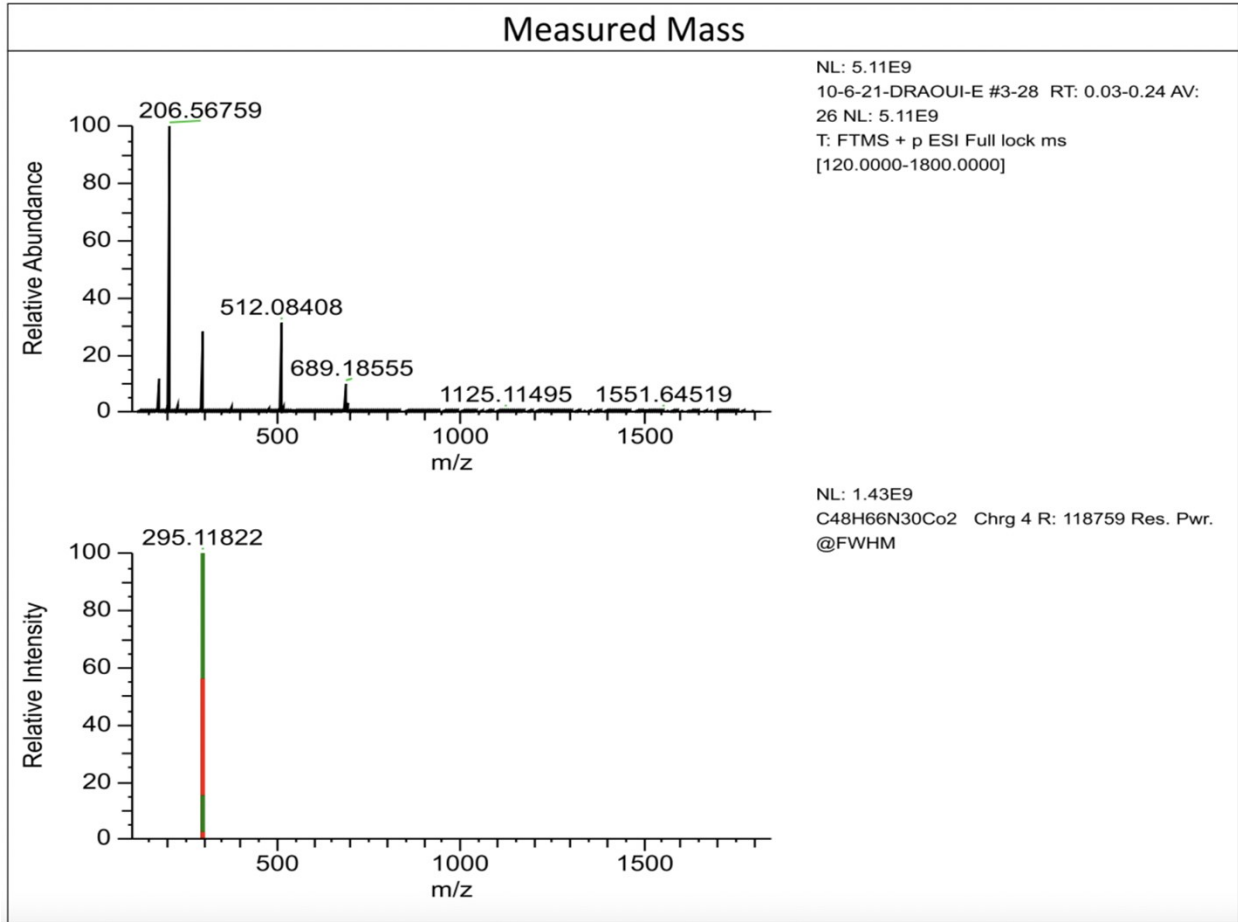

**Elemental Composition Results**

| Peak Mass | Display Formula                                                               | MS Cov. [%] | Delta [ppm] | Theo. mass |
|-----------|-------------------------------------------------------------------------------|-------------|-------------|------------|
| 295.11811 | C <sub>48</sub> H <sub>66</sub> N <sub>30</sub> <sup>59</sup> Co <sub>2</sub> | 78.07       | -0.37       | 295.11822  |
| 295.11811 | C <sub>24</sub> H <sub>33</sub> N <sub>15</sub> <sup>59</sup> Co              | 99.21       | -0.37       | 295.11822  |

**HRMS of 7:**

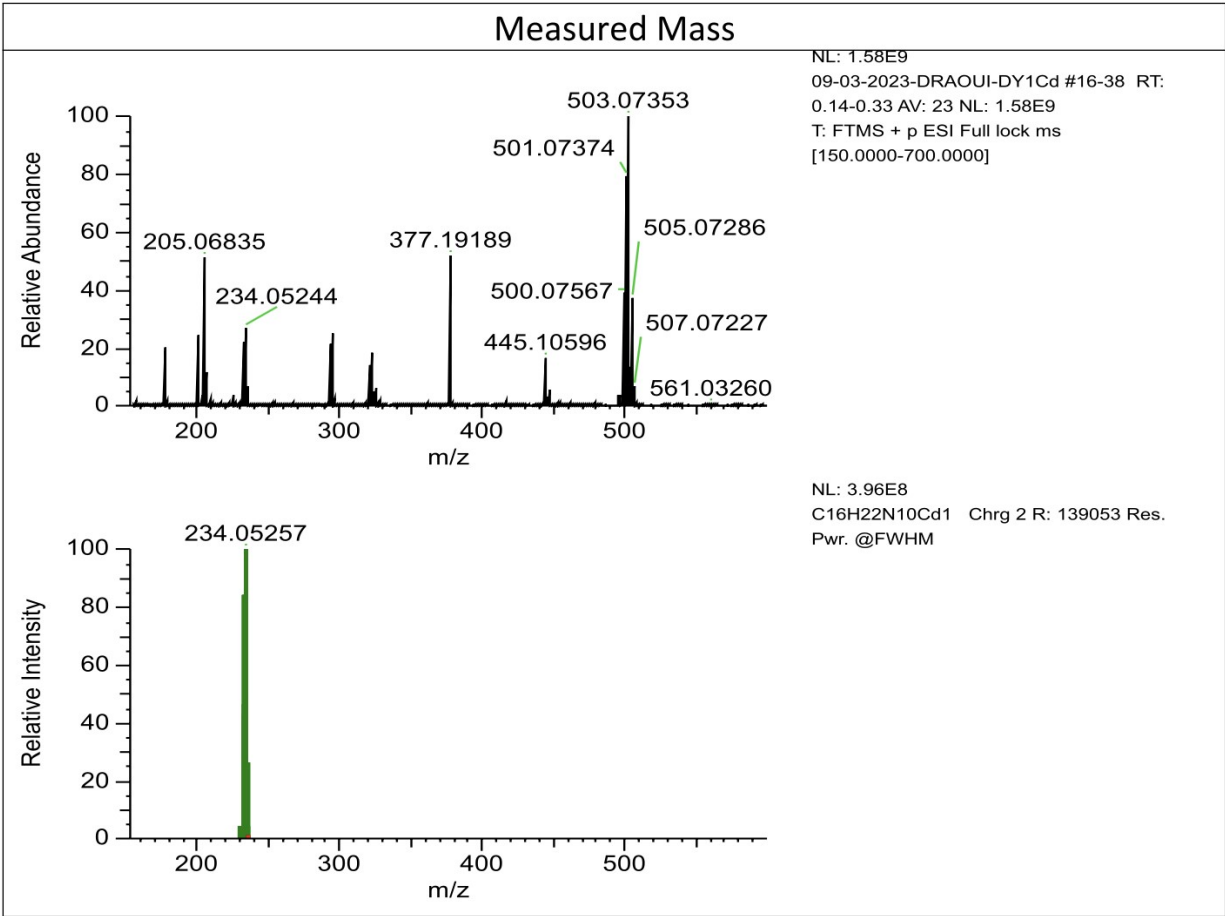

**Elemental Composition Results**

| Peak Mass | Display Formula                                                   | MS Cov. [%] | Delta [ppm] | Theo. mass |
|-----------|-------------------------------------------------------------------|-------------|-------------|------------|
| 230.05410 | C <sub>16</sub> H <sub>22</sub> N <sub>10</sub> <sup>108</sup> Cd | 99.53       | -0.11       | 230.05413  |

**HRMS of 8:**

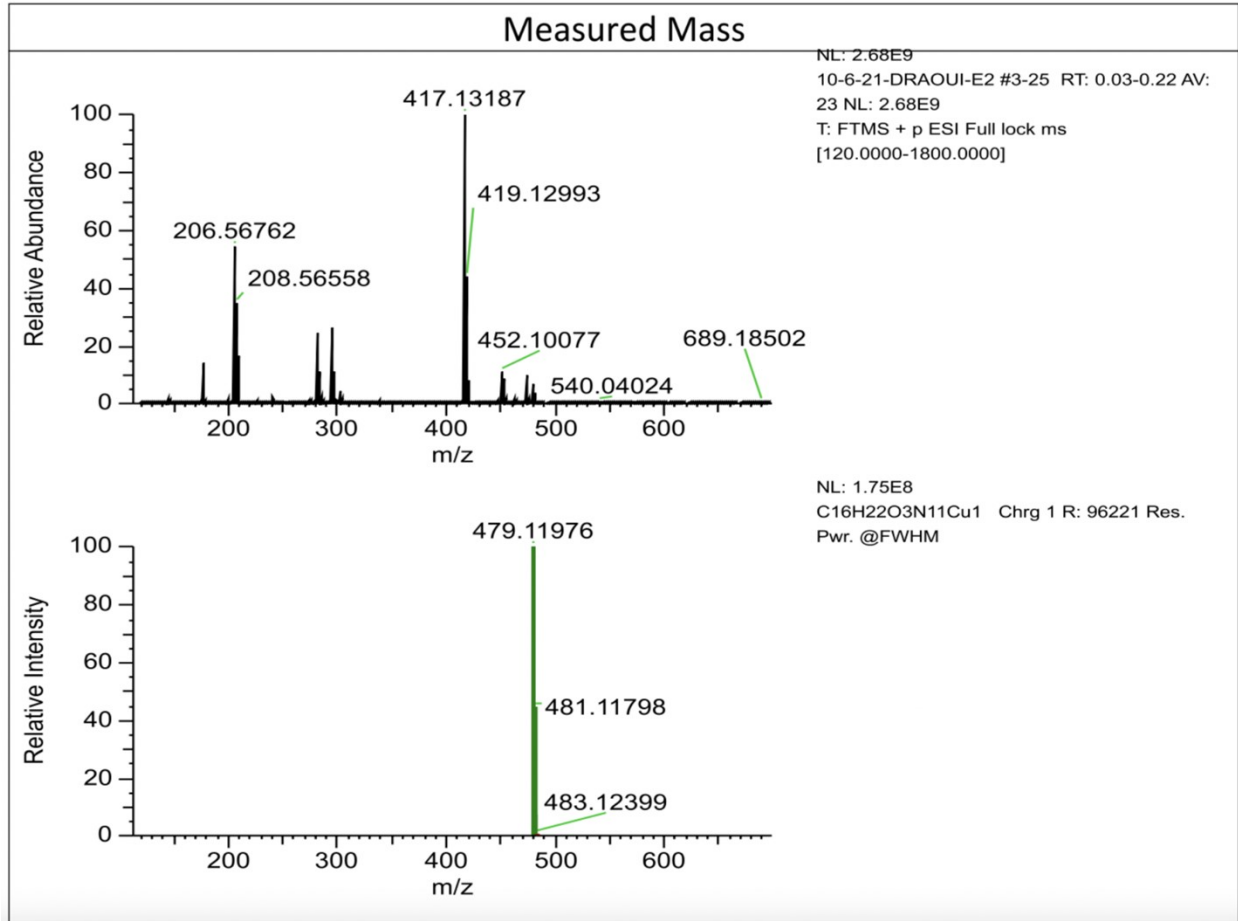

**Elemental Composition Results**

| Peak Mass | Display Formula                                                                 | MS Cov. [%] | Delta [ppm] | Theo. mass |
|-----------|---------------------------------------------------------------------------------|-------------|-------------|------------|
| 479.11979 | C <sub>16</sub> H <sub>22</sub> O <sub>3</sub> N <sub>11</sub> <sup>63</sup> Cu | 99.23       | 0.06        | 479.11976  |

**HRMS of 10:**

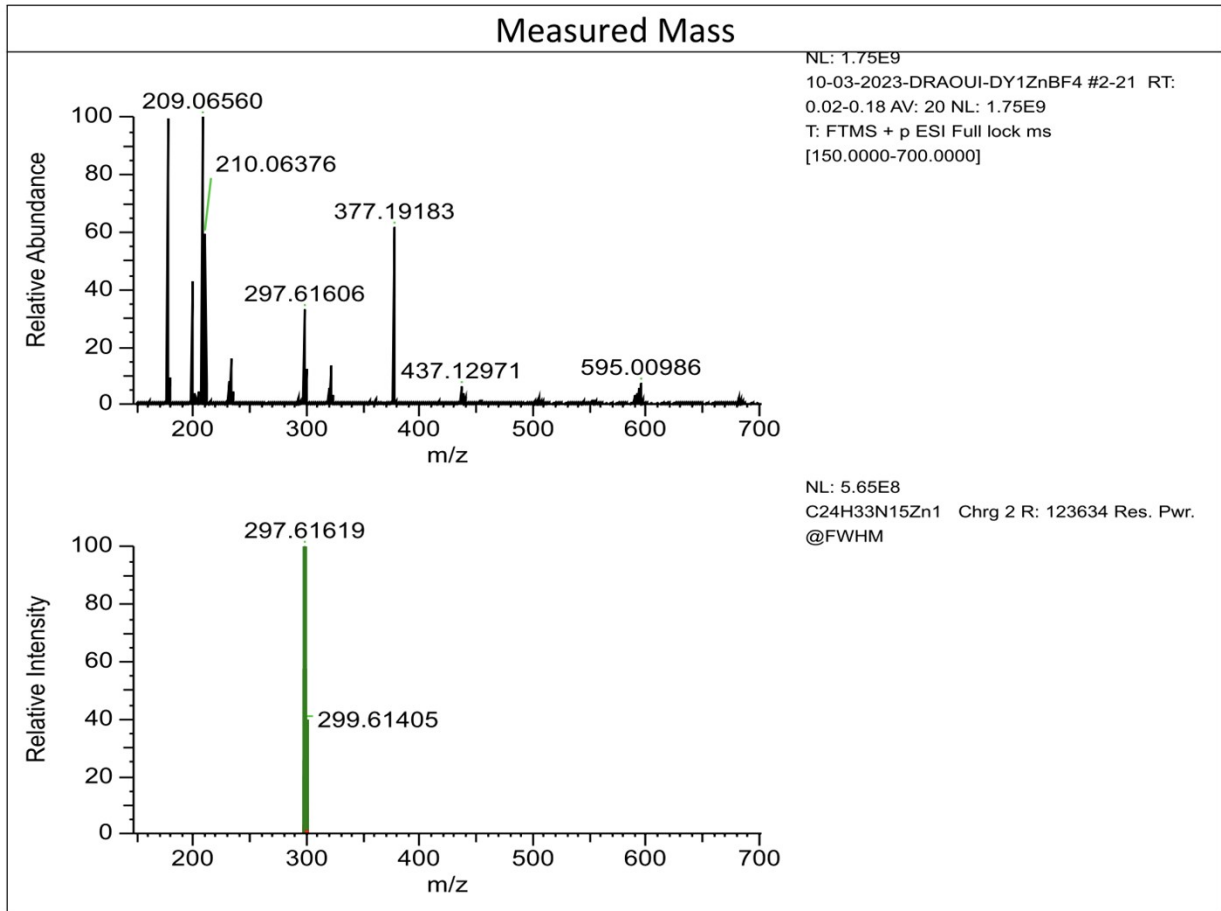

**Elemental Composition Results**

| Peak Mass | Display Formula                                                  | MS Cov. [%] | Delta [ppm] | Theo. mass |
|-----------|------------------------------------------------------------------|-------------|-------------|------------|
| 297.61606 | C <sub>24</sub> H <sub>33</sub> N <sub>15</sub> <sup>6+</sup> Zn | 99.02       | -0.46       | 297.61619  |
